# Supplementary material for: Facile Synthesis of Cu-Zn Binary Oxide Coupled Cadmium Tungstate (Cu-ZnBO-Cp-CT) with Enhanced Performance of Dye Adsorption
Source: MDPI journal article supplement (doi:10.3390/w13223287), 2021-11-20
Supplement: s1 [file s1]

Archive with 1 entries (1 files):
- water-1440982-supplementary.pdf
